# Supplementary material for: Simplified Drop-seq workflow with minimized bead loss using a bead capture and processing microfluidic chip
Source: Royal Society of Chemistry journal article supplement (doi:10.1039/c9lc00014c), 2019-01-01
Supplement: c9lc00014c2.pdf [file c9lc00014c2.pdf]

## Supplementary Material

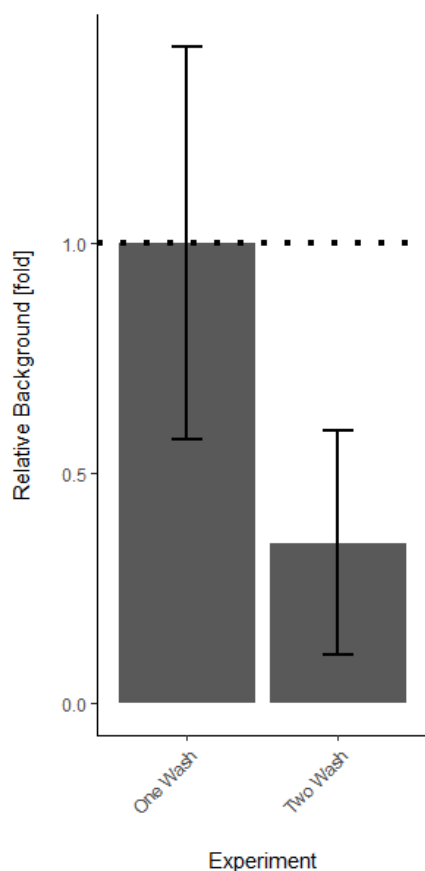

**Figure S1.** Impact of bead washing on background.

The figure shows the impact of adding one more washing step (introduced in the bead capture protocol when utilizing the cp-chip) compared to the original protocol. One emulsion comprised of droplets containing beads hybridized to human RNA, and droplets containing contaminating *Drosophila* RNA was generated. The emulsion was split, with one half being processed using the original Drop-seq protocol (One Wash), and the other half using the same protocol but adding one more washing step (Two Wash).
